# Supplementary material for: Using Carbon Isotope Equilibrium to Screen Pedogenic Carbonate Oxygen Isotopes: Implications for Paleoaltimetry and Paleotectonic Studies
Source: Hindawi journal article supplement (doi:10.1155/2018/5975801), 2018-12-10
Supplement: f1 [file 5975801.f1.pdf]

## Supplemental Materials

Table 1. Soil Organic Matter  $\delta^{13}\text{C}_{\text{org}}$  Data

| Soil Series | Soil Pit | Sample | depth (cm) | $\delta^{13}\text{C}_{\text{org}}$ |
|-------------|----------|--------|------------|------------------------------------|
| Guvo        | Pit GS1  | GS1    | 5          | -22.05                             |
|             |          | GS2    | 10         | -20.78                             |
|             |          | GS3    | 20         | -21.50                             |
|             | Pit GS2  | GS4    | 5          | -24.19                             |
|             |          | GS5    | 10         | -22.66                             |
|             |          | GS6    | 20         | -21.73                             |
|             | Pit GS3  | GS7    | 5          | -22.49                             |
|             |          | GS8    | 17         | -20.65                             |
|             |          | GS9    | 30         | -20.52                             |
|             | Pit GS4  | GS10   | 5          | -21.72                             |
|             |          | GS11   | 15         | -21.51                             |
|             |          | GS12   | 25         | -21.46                             |
|             | Pit GS5  | GS13   | 5          | -23.74                             |
|             |          | GS14   | 15         | -21.44                             |
|             |          | GS15   | 25         | -20.51                             |
| Delthorny   | Pit TS1  | TS1    | 5          | -19.06                             |
|             |          | TS2    | 15         | -19.08                             |
|             | Pit TS2  | TS3    | 5          | -20.42                             |
|             |          | TS4    | 15         | -20.14                             |
|             |          | TS5    | 27         | -20.22                             |
|             | Pit TS3  | TS6    | 5          | -20.91                             |
|             |          | TS7    | 12         | -20.16                             |
|             | Pit TS4  | TS8    | 5          | -22.31                             |
|             |          | TS9    | 10         | -20.79                             |
|             |          | TS10   | 20         | -18.30                             |

Table 2. Pedogenic Carbonate Isotope Data

| Soil Series | Sample  | PDB<br>$\delta^{13}\text{C}_{\text{carb}}$ | $\sigma$ | PDB<br>$\delta^{18}\text{O}_{\text{carb}}$ | $\sigma$ | SMOW  |
|-------------|---------|--------------------------------------------|----------|--------------------------------------------|----------|-------|
| Delthorny   | TSC1-1  | -3.31                                      | 0.65     | -7.56                                      | 0.06     | 23.11 |
|             | TSC1-2  | -2.64                                      | 0.81     | -7.85                                      | 0.31     | 22.82 |
|             | TSC1-3  | -2.75                                      | 0.27     | <b>-2.75</b>                               | 0.27     | 28.08 |
|             | average | -2.90                                      |          | -7.71                                      |          | 22.96 |
|             | stdev   | 0.36                                       |          |                                            |          |       |
|             |         |                                            |          |                                            |          |       |
|             | TSC2-1  | -4.07                                      | 0.23     | -8.31                                      | 0.04     | 22.35 |
|             |         |                                            |          |                                            |          |       |
|             | TSC3-1  | -2.83                                      | 0.49     | -5.04                                      | 0.13     | 25.72 |
|             | TSC3-2  | -3.99                                      | 0.77     | -4.55                                      | 0.25     | 26.22 |
|             | TSC3-3  | -3.35                                      | 0.55     | <b>-3.35</b>                               | 0.17     | 27.46 |
|             | average | -3.39                                      |          | -4.79                                      |          | 25.97 |
|             | stdev   | 0.58                                       |          |                                            |          |       |
|             |         |                                            |          |                                            |          |       |
|             | TSC4-1  | -4.29                                      | 0.37     | -8.01                                      | 0.18     | 22.65 |
|             | TSC4-2  | -3.39                                      | 0.68     | <b>-3.39</b>                               | 0.68     | 27.42 |
|             | TSC4-3  | -3.32                                      | 0.14     | -9.34                                      | 0.24     | 21.28 |
|             | average | -3.67                                      |          | -8.67                                      |          | 21.97 |
|             | stdev   | 0.54                                       |          |                                            |          |       |
|             |         |                                            |          |                                            |          |       |
| Guvo        | GS1-1   | -5.07                                      | 0.23     | <b>-8.36</b>                               | 0.11     | 22.29 |
|             | GS1-2   | -5.22                                      | 0.32     | -5.22                                      | 0.32     | 25.53 |
|             | GS1-3   | -4.66                                      | 0.17     | -4.66                                      | 0.17     | 26.11 |
|             | average | -4.98                                      |          | -4.94                                      |          | 25.82 |
|             | stdev   | 0.29                                       |          |                                            |          |       |
|             |         |                                            |          |                                            |          |       |
|             | GS2-1   | <b>-3.34</b>                               | 1.33     | <b>-3.90</b>                               | 2.02     | 26.89 |
|             | GS2-2   | -6.22                                      | 0.08     | -6.03                                      | 0.17     | 24.69 |
|             | GS2-3   | -5.60                                      | 0.04     | -6.20                                      | 0.37     | 24.52 |
|             | average | -5.05                                      |          | -6.11                                      |          | 24.61 |
|             | stdev   | 0.43                                       |          | 0.12                                       |          |       |
|             |         |                                            |          |                                            |          |       |
|             | GS3-1   | -4.49                                      | 0.22     | <b>-8.65</b>                               | 0.62     | 22.00 |
|             | GS3-2   | -4.78                                      | 0.38     | -6.36                                      | 0.43     | 24.35 |
|             | GS3-3   | -4.02                                      | 0.16     | -6.99                                      | 0.97     | 23.70 |
|             | average | -4.43                                      |          | -6.68                                      |          | 24.03 |
|             | stdev   | 0.38                                       |          |                                            |          |       |

|  |         |       |      |              |      |       |
|--|---------|-------|------|--------------|------|-------|
|  |         |       |      |              |      |       |
|  | GS4-1   | -4.83 | 0.23 | -4.83        | 1.23 | 25.93 |
|  | GS4-2   | -4.79 | 0.49 | <b>-7.48</b> | 1.39 | 23.20 |
|  | GS4-3   | -4.39 | 0.89 | -5.86        | 1.31 | 24.86 |
|  | average | -4.67 |      | -5.35        |      | 25.40 |
|  | stdev   | 0.24  |      |              |      |       |
|  |         |       |      |              |      |       |
|  | GS5-1   | -5.50 | 0.06 | -7.71        | 0.33 | 22.96 |
|  | GS5-2   | -5.41 | 0.15 | -7.46        | 0.20 | 23.22 |
|  | GS5-3   | -4.73 | 0.47 | -7.85        | 0.60 | 22.81 |
|  | average | -5.21 |      | -7.67        |      |       |
|  | stdev   | 0.42  |      |              |      |       |

$\sigma$  values for individual nodules are based upon three discrete micro-samples of micritic calcite. The “stdev” refers to the  $\sigma$  value about the mean. Data in bold type represent outliers that were not considered part of the analysis.
